# Supplementary material for: BIN2 phosphorylates the Thr280 of CO to restrict its function in promoting Arabidopsis flowering
Source: Front Plant Sci. 2023 Jan 30;14:1068949. doi: 10.3389/fpls.2023.1068949 (PMC9923014; doi:10.3389/fpls.2023.1068949)
Supplement: Supplementary file 9 [file Table_1.xlsx]

## Sheet: Figure 2B
Figure 2B
	Col-0	bin2-1	bri1-116
	23	26	39
	23	26	40
	23	26	40
	23	27	40
	23	27	41
	23	27	42
	24	28	43
	24	28	44
	24	31	47
	24	31	47
	24	31	47
	24	31	49
	24	32	49
	24	32	49
	25	32	50
	25	32	50
	25	32	53
	25	32	53
	25	32	53
	26	32	53
	26	32	53
	26	33	53
	26	33	53
	26	33	53
	26	33	53
	26	33	53
	26	34	53
	26	34	53
	26	34	54
	26	34	55
	26	35	58
	26	35	58
	26	35	58
	26	36	58
	26	36	58
	27	37	58
	27	38	58
	27	38	59
	27	38	59
	27	38	62
	27	38	62
	27	40	63
	27	41	64
	27	42	64
	27	42	65
	27	43	65
	28	44	65
	28		66
	28		66
	28
	28
	29
	29
	31
	31
	31
	32

## Sheet: Figure 2E
Figure 2E
	Col-0	YFP-CO	bin2-1/YFP-CO	bin2-1
	21	15	15	26
	21	15	15	26
	22	15	16	27
	23	15	16	28
	23	15	16	29
	23	16	16	29
	23	16	16	29
	23	16	16	31
	23	16	16	31
	23	16	16	31
	23	16	16	31
	24	16	17	32
	24	16	17	32
	24	16	17	32
	24	16	17	32
	25	16	17	32
	25	16	17	32
	25	16	17	32
	25	16	19	33
	25	16	19	33
	25	16	19	34
	25	17	19	34
	25	17	19	34
	25	17	19	35
	25	17	19	35
	25	17	19	36
	26	17	19	36
	26	17	19	36
	26	17	19	36
	26	17	19	36
	26	17	20	36
	27	17	20	36
	27	18	20	36
	27	18	20	36
	27	19	20	36
	28	19	20	36
			20	39
			20	40
			20	40
			20	40
			20	41
			20	42
			20	43
			20	44
			21
			21
			21
			21
			21
			21
			22
			22
			26

## Sheet: Figure 4B
Figure 4B
	Col-0	co-9	Flag-CO/CO-9	Flag-COT280A/co-9#1	Flag-COT280A/co-9#2
	19	47	18	16	16
	20	47	18	16	16
	20	49	18	16	16
	20	47	18	16	16
	20	49	18	16	16
	20	48	18	17	16
	20	43	18	17	16
	20	46	19	17	16
	21	46	19	18	17
	21	47	19	18	17
	21	44	20	18	17
	21	48	20	18	17
	21	48	20	18	17
	21	50	20	18	17
	21	49	20	18	17
	21	44	21	18	18
	21	50	21	18	18
	22	46	22	18	18
	22	50	22	18	19
	22	50	23	18	19
	22	50	24	18	19
	22	52	24		19
	22	49	25
	22	49	26
	22
	22
	22
	23
	23
	23
	23
	23
	23
	23
	23
	24
	25
	26

## Sheet: Figure 4C
Figure 4C
	Col-0	co-9	Flag-CO/CO-9	Flag-COT280A/co-9#1	Flag-COT280A/co-9#2
	9	43	9	7	7
	9	42	9	7	7
	10	37	9	7	7
	10	40	9	7	7
	11	38	9	8	8
	11	41	9	8	8
	11	43	10	8	8
	11	39	10	8	8
	11	40	10	8	8
	11	37	10	8	8
	11	40	10	8	8
	11	37	10	8	8
	11	38	11	8	9
	11	40	11	8	9
	13	41	11	8	9
	13		11	8	9
	13		11	8	9
	12		12	8	9
	12		12	8	9
	12			9	9
	12			9	9
	12			9
	12			9
	12
	12
	12
	12
	12

## Sheet: Supplemental Figure 2B
Supplemental Figure 2B
	Col-0	det2-9
	22	26
	22	26
	22	26
	22	29
	22	30
	22	30
	22	30
	22	31
	22	31
	22	31
	22	31
	22	32
	22	32
	22	32
	22	32
	22	32
	22	32
	22	32
	22	33
	22	33
	22	33
	23	33
	23	33
	24	33
	24	33
	24	33
	24	34
	24	38
	24	38
	25	38
	25	38
	25	38
	25
	25

## Sheet: Source data
Figure 2B
	Mean	SD
Col-0	26.1579	2.11111
bin2-1	33.7021	4.61055
bri1-116	53.6327	7.6776
Figure 2C
	Col-0			bin2-1			bri1-116
0h	1.09936	1.00463	0.905425	0.533416	0.480742	0.718636	0.183011	0.503478	0.554785
4h	1.7211	1.70921	1.62826	0.394109	0.388683	0.425334	0.45376	0.403321	0.45376
8h	0.589134	0.538369	0.553504	0.30566	0.368567	0.392292	0.461158	0.461158	0.454809
12h	2.80241	3.06666	2.86129	1.20581	1.40444	1.41421	0.777366	1.01866	1.03288
16h	13.3614	13.1775	12.3805	3.71493	2.85469	2.71949	1.1355	1.03766	1.1355
20h	4.357	4.44854	3.79298	1.96791	2.57874	1.95432	0.782773	0.618423	0.681444
24h	1.01162	1.10701	1.05458	0.390483	0.583714	0.575678	0.370274	0.294567	0.362654
Figure 2E
	Mean	SD
Col-0	24.5833	1.69663
YFP-CO	16.4444	0.998411
bin2-1	34.2045	4.38061
YFP-CO/bin2-1	18.8113	2.16668
Figure 4B
	Mean	SD
Col-0	21.7632	1.47839
co-9	47.8333	2.21981
Flag-CO/co-9 #1	20.4583	2.44912
Flag-COT280A/co-9 #1	17.3809	0.86465
Flag-COT280A/co-9 #2	17.1429	1.15166
Figure 4C
	Mean	SD
Col-0	11.3929	0.821429
co-9	40	1.8
Flag-CO/co-9 #1	10.1579	0.831025
Flag-COT280A/co-9 #1	8	0.347826
Flag-COT280A/co-9 #2	8.23809	0.653061
Figure 4D
Col-0	0.941696	0.988514	1.07425
co-9	0.03892	0.021743	0.023303
Flag-CO/co-9 #1	30.3439	31.4139	31.197
Flag-COT280A/co-9 #1	34.856	36.8434	35.3425
Flag-COT280A/co-9 #2	28.1163	33.2051	30.7675
Figure 4E
Col-0	1.00928	0.948246	1.04488
co-9	0.014213	0.005348	0.010623
Flag-CO/co-9 #1	1.88775	1.86176	1.72508
Flag-COT280A/co-9 #1	4.95883	4.95883	4.89056
Flag-COT280A/co-9 #2	3.29436	3.01049	3.01049
Figure 4G
P1
No-Ab	Col-0	1.08673	1	0.920188
	Flag-CO/co-9 #1	1.00696	0.993092
	Flag-COT280A/co-9 #1	0.898132	1.11342	1
α-Flag	Col-0	1.12506	0.913831	1.23971
	Flag-CO/co-9 #1	1.74842	1.81504	1.68179
	Flag-COT280A/co-9 #1	4.45369	4.77334	4.61351
P2
No-Ab	Col-0	0.770215	1.09682	1.18372
	Flag-CO/co-9 #1	1.17013	0.97041	0.880666
	Flag-COT280A/co-9 #1	0.860551	1.06683	1.08925
α-Flag	Col-0	0.941696	1.03049	0.890899
	Flag-CO/co-9 #1	13.8007	12.966	12.0977
	Flag-COT280A/co-9 #1	26.7846	24.1397	27.5376
Figure 5A
nLUC-CO					cLUC-CO
1	0.89	1.09	1.02		1	1.05	1.14	0.95
2	0	0	0		2	0	0	0
3	0	0	0		3	0.8	0.85	0.92
4	0.89	0.93	0.95		4	0	0	0
Figure 5B
nLUC-CO					cLUC-CO
1	0.98	1.09	0.94		1	1.07	1.01	0.93
2	0.99	0.89	0.98		2	0	0	0
3	0	0	0		3	0.75	0.7	0.72
4	1.12	1.08	1.16		4	0.85	0.81	0.83
Figure 5D
	Relative luminescence
1	1	1	1	1	1	1	1	1	1	1
2	0.78747	0.738894	0.704663	0.688196	0.625332	0.578907	0.477133	0.376588	0.371031	0.324415
Figure 5F
cLUC-CO-NT
1	1.01631	1.01631	0.968171
2	0.905425	0.963707	0.943874
Figure 5G
nLUC-CO-NT
1	1.01631	1.01631	0.968171
2	0.905425	0.963707	0.943874
Supplemental Figure 1A
0h	0.99539	0.981686	1.02337
4h	0.646176	0.650671	0.687771
8h	0.559936	0.544624	0.544624
12h	0.743979	0.759611	0.754364
16h	0.440333	0.455861	0.449585
20h	0.628507	0.641713	0.646176
24h	0.66588	0.625609	0.708742
Supplemental Figure 1B
0h	1.09429	0.965936	0.946058
4h	0.033262	0.030186	0.025208
8h	0.043586	0.045753	0.045123
12h	0.302848	0.249423	0.2477
16h	0.112917	0.112137	0.102474
20h	0.395021	0.381565	0.366021
24h	0.210224	0.243164	0.20166
Supplemental Figure 2B
	Mean	SD
Col-0	22.8529	1.18404
det2-9	32.2812	3.22525
Supplemental Figure 2C
Col-0			det2-9
1.26868	0.935191	0.842842	1.09177	0.44648	1.0693
0.230047	0.181747	0.258816	0.310644	0.168794	0.206374
0.312083	0.188156	0.173139	0.153893	0.08362	0.174343
0.943874	0.862542	1.04006	0.742262	0.68302	0.356013
4.03714	5.4014	4.3873	1.34723	1.34723	1.40444
1.9816	1.55473	2.16845	0.578344	0.466516	0.586417
0.692555	0.702222	0.586417	0.332171	0.496546	0.400535
Supplemental Figure 3
Col-0	1.10957	0.90125
bin2-1	0.629961	0.679871	0.754364
YFP-CO/bin2-1	35.3425	32.2971
