# Supplementary material for: BIN2 phosphorylates the Thr280 of CO to restrict its function in promoting Arabidopsis flowering
Source: Front Plant Sci. 2023 Jan 30;14:1068949. doi: 10.3389/fpls.2023.1068949 (PMC9923014; doi:10.3389/fpls.2023.1068949)
Supplement: Supplementary file 10 [file Table_2.xlsx]

## Sheet: Sheet1
Table S1. Constructs and primers used in this smudy.
Assay	Construct /Mutant	Primer Name	Primer Sequence (5'-3')
qRT-PCR		RT-CO-F	TCACTACAACGACAATGGTTCC
		RT-CO-R	CAGGGTCAGGTTGTTGCTCT
		RT-FT-F	TCAGGTTCAAAACAAGCCAAGA
		RT-FT-R	TGCCAAGCTGTCGAAACAATA
		RT-BIN2-F	CAGACAATTAGTTACATGGCGG
		RT-BIN2-R	TGTAGTCGAAAAGAAGCAATGC
		RT-ACTIN-F	TCCATGAAACAACTTACAACTCCATCA
		RT-ACTIN-R	CATCGTACTCACTCTTTGAAATCCACA
		RT-nLUC-F	TCTGCCTCATAGAACTGCCTG
		RT-nLUC-R	GAGAATAGGGTTGGCACCA
		RT-cLUC-F	TCCAACACCCCAACATCTTC
		RT-cLUC-R	TGCTTCGTCCACAAACACAACTC
		RT-NbACTIN-F	CCAAAGGCTAATCGTGAAAAG
		RT-NbACTIN-R	GCTGTGGTAGTGGATGAGTAAC
LCI	nLUC-CO	CO-nCLU-F	CACGGGGGACGAGCTCGGTACCATGTTGAAACAAGAGAGTAACG
		CO-nLUC-R	ACGCGTACGAGATCTGGTCGACGAATGAAGGAACAATCCCATAT
	cLUC-CO-NT	CO-NT-cLUC-F	ACGCGTCCCGGGGCGGTACCATGTTGAAACAAGAGAGTAACG
		CO-NT-cLUC-R	GTTGCTGCAGGTCGACTCAATCACTAAACAATAACCCA
	nLUC-CO-CT	CO-CT-cLUC-F	ACGCGTCCCGGGGCGGTACCATGGAGTATCTAAACCTTGTGGA
		CO-CT-cLUC-R	GTTGCTGCAGGTCGACTCAGAATGAAGGAACAATCCCA
	cLUC-CO	CO-cLUC-F	ACGCGTCCCGGGGCGGTACCATGTTGAAACAAGAGAGTAACGA
		CO-cLUC-R	GTTGCTGCAGGTCGACTCAGAATGAAGGAACAATCCCA
	cLUC-BIN2	BIN2-cLUC-F	ACGCGTCCCGGGGCGGTACCATGGCTGATGATAAGGAGATGC
		BIN2-cLUC-R	GTTGCTGCAGGTCGACTTAAGTTCCAGATTGATTCAAG
	cLUC-SK12	SK12-cLUC-F	ACGCGTCCCGGGGCGGTACCATGGCCTCGGTGGGCATAGAGC
		SK12-cLUC-R	GTTGCTGCAGGTCGACCAAACTGAGCCACGGACATTGC
	cLUC-SnRK2.6	SnRK2.6-cLUC-F	ACGCGTCCCGGGGCGGTACCATGGATCGACCAGCAGTGAGT
		SnRK2.6-cLUC-R	GTTGCTGCAGGTCGACCATTGCGTACACAATCTCTCCGC
	cLUC-MPK6	MPK6-cLUC-F	ACGCGTCCCGGGGCGGTACCATGGACGGTGGTTCAGGTCAACC
		MPK6-cLUC-R	GTTGCTGCAGGTCGACTTGCTGATATTCTGGATTGAAAGC
ChIP-PCR assay		FT-P1F	TTCCTCATCCACTTGCCAATCTTCG
		FT-P1R	GCTAGTAGAGGCTTCTGCGTCACCA
		FT-P2F	CCAGTGTATTAGTGTGGTGGGTTTG
		FT-P2R	GCATTAACTCGGGTCGGTGAAATC
Y2H	pGADT7-CO	CO-AD-F	GTACCAGATTACGCTCATATGATGTTGAAACAAGAGAGTAACG
		CO-AD-R	ATGCCCACCCGGGTGGAATTCGAATGAAGGAACAATCCCAT
	pGBKT7-TOE1	TOE1-BD-F	TCAGAGGAGGACCTGCATATGATGTTGGATCTTAACCTCAACG
		TOE1-BD-R	TCGACGGATCCCCGGGAATTCTTAAGGGTGTGGATAAAAGTAA
	pGBKT7-NF-YC-4	NF-YC4-BD-F	TCAGAGGAGGACCTGCATATGATGGACAATAACAACAACAACA
		NF-YC4-BD-R	TCGACGGATCCCCGGGAATTCTCAACCTTGGCTATCGAGATTAC
	pGBKT7-BIN2	BIN2-BD-F	TCAGAGGAGGACCTGCATATGATGGCTGATGATAAGGAGATGC
		BIN2-BD-R	TCGACGGATCCCCGGGAATTCTTAAGTTCCAGATTGATTCAAG
Pull-down and in vitro phosphorylation assays	MBP-BIN2	BIN2-pMAL-F	GAGGGAAGGATTTCAGAATTCATGGCTGATGATAAGGAGATGC
		BIN2pMAL-R	CAAGCTTGCCTGCAGGTCGACAGTTCCAGATTGATTCAAGAAG
	GST-CO	CO-4T-1-F	CCGCGTGGATCCCCGGAATTCATGATGGCTGATGATAAGGAGA
		CO-4T-1-R	ATCCGGCCGCTCGAGTCGACTCAGAATGAAGGAACAATCCCA
Generation of transgenic plants	35S:YFP-CO	CO-QBV3-F	ATGTTGAAACAAGAGAGTAACGA
		CO-QBV3-R	GAATGAAGGAACAATCCCA
	pCO:CO-Flag	CO-1300-F	CGACGATGATAAGGGCGGTACCATGTTGAAACAAGAGAGTAACG
		CO-1300-R	CGTCCTAGGCTACGTAGGATCCGAATGAAGGAACAATCCCATAT
		ProCO-1300-F	ACTACATCTGAGTTATTTCTAGAGGATCTCGAGGCGCGCCGTCG
		ProCO-1300-R	GCCTCGAGATCCTCTAGAGAATGAAGGAACAATCCCATAT
Generation and detection of mutants	bin2-1D	bin2-1D-F	ATCTGCTCACGATTCTACCG
		bin2-1D-R	CTCAAGACCAATGCTTACCG
	bri1-116	bri1-116-F	GCTAAGCAACAATTCATTCTCC
		bri1-116-R	AACCAATCTCCTTCGGTATGT
	CON1A	CO-mu-N1-F	TGTGACACATGCCGGGCAAACGCCTGCGCCGTGTATTGCCATGCAGATTCTGC
		CO-mu-N1-R	TGCATGGCAATACACCGCAGGCGTTTGCCCGGCATGTGTCACAGGGTCGTGCC
	CON2A	CO-mu-N2-F	GATGCCTCTCTATGCGCAGCCTGTGATGCAGAGGTTCATTCTGCAAACCCACT
		CO-mu-N2-R	CAGAATGAACCTCTGCATCACAGGCTGCGCATAGAGAGGCATCATCTGCCTCA
	CON3A	CO-mu-N3-F	GATTCAGAGGTTCATGCTGCAAACCCACTTGCTAGACGCCA
		CO-mu-N3-R	CAAGTGGGTTTGCAGCATGAACCTCTGAATCACAGGCTGTG
	COM1A	CO-mu-M1-F	TCTGGAAACTCTTTCGCCTCCATGACCGCTACTCACCACCAAAGCGAGAAAAC
		CO-mu-M1-R	TTTGGTGGTGAGTAGCGGTCATGGAGGCGAAAGAGTTTCCAGAAATTGGTAGA
	COM2A	CO-mu-M2-F	AGCTCCATGACCACTGCTCACCACCAAGCCGAGAAAACAATGACCGATCCAGA
		CO-mu-M2-R	GGTCATTGTTTTCTCGGCTTGGTGGTGAGCAGTGGTCATGGAGCTGAAAGAGTTT
	COM3A	CO-mu-M3-F	ATGGACTACAAATTCGCAGGTGAATACGCTCAACACCAACAAAACTGCAGCGT
		CO-mu-M3-R	TTTTGTTGGTGTTGAGCGTATTCACCTGCGAATTTGTAGTCCATACTCGAGTTG
	COM4A	CO-mu-M4-F	CACCAACAAAACTGCGCCGTACCACAGGCGAGCTACGGGGGAGATAGAGTTGT
		CO-mu-M4-R	CTCCCCCGTAGCTCGCCTGTGGTACGGCGCAGTTTTGTTGGTGTTGACTGTAT
	COM5A	CO-mu-M5-F	CATAACGCATACATTGCATCCATGGAAGCTGGTGTTGTGCCGGAGTCAACAGCA
		CO-mu-M5-R	CTCCGGCACAACACCAGCTTCCATGGATGCAATGTATGCGTTATGGTTAATGGAA
	COC1A	CO-mu-C1-F	GTTGTGCCGGAGTCAGCAGCATGTGTCGCAACAGCTTCACACCCAAGAACGCC
		CO-mu-C1-R	TGGGTGTGAAGCTGTTGCGACACATGCTGCTGACTCCGGCACAACACCAGTTTCC
	COC2A	CO-mu-C2-F	TGTGTCACAACAGCTGCACACCCAAGAACGCCCAAAGGGACAG
		CO-mu-C2-R	GGGCGTTCTTGGGTGTGCAGCTGTTGTGACACATGCTGTTGAC
	COC3A	CO-mu-C3-F	GCTTCACACCCAAGAGCGCCCAAAGGGGCAGTAGAGCAACAACCTGACCCTGC
		CO-mu-C3-R	GTTGTTGCTCTACTGCCCCTTTGGGCGCTCTTGGGTGTGAAGCTGTTGTGACA
	COC4A	CO-mu-C4-F	CAACCTGACCCTGCAGCCCAGATGATAGCAGTAACACAACTCAGTCCAATGGA
		CO-mu-C4-R	TGAGTTGTGTTACTGCTATCATCTGGGCTGCAGGGTCAGGTTGTTGCTCTACT
	COT280A	CO-mu-T280A-F	GCTTCACACCCAAGAGCGCCCAAAGGGACAGTAGAGCAACAACCTGACCCTGC
		CO-mu-T280A-R	GTTGTTGCTCTACTGTCCCTTTGGGCGCTCTTGGGTGTGAAGCTGTTGTGACA
	COT280D	CO-mu-T280D-F	GCTTCACACCCAAGAGATCCCAAAGGGGACATAGAGCAACAACCTGACCCTGC
		CO-mu-T280D-R	GTTGTTGCTCTACTGTCCCTTTGGGATCTCTTGGGTGTGAAGCTGTTGTGACA
	det2-9	det2-9-F	TCGCCGATAAAACCTTCTT
		det-2-9-R	GAGCGTGACGACCAAAGG
	BIN2K69R	BIN2-mu-69-F	GAAACCGTGGCGATACGGAAGGTTTTGCAAGATAGAAGATAC
		BIN2-mu-69-R	ATCTTGCAAAACCTTCCGTATCGCCACGGTTTCTCCAGTCTCC
